# Supplementary material for: Optical and electronic properties of different thin-film polymorphs of PDIF-CN2 controlled by zone-casting conditions
Source: Royal Society of Chemistry journal article supplement (doi:10.1039/d3tc01101a), 2023-01-01
Supplement: d3tc01101a2.pdf [file d3tc01101a2.pdf]

# Electronic Supporting Information

## **Optical and electronic properties of different thin-film polymorphs of PDIF-CN<sub>2</sub> controlled by zone-casting conditions**

Niklas J. Herrmann,<sup>a</sup> Nadine von Coelln,<sup>a</sup> Robin M. Teichgreber,<sup>b</sup> Sebastian Höfener,<sup>c</sup>  
Christian Huck,<sup>a</sup> Farhad Ghalami,<sup>c</sup> Simon Settele,<sup>a</sup> Manuel Hertzog,<sup>a</sup> Marcus Elstner,<sup>cd</sup> Petra  
Tegeder,<sup>a</sup> Eva M. Herzig,<sup>b</sup> and Jana Zaumseil\*<sup>a</sup>

<sup>a</sup> Institute for Physical Chemistry, Heidelberg University, Heidelberg, Germany

<sup>b</sup> Institute of Physics, University of Bayreuth, Bayreuth, Germany

<sup>c</sup> Institute of Physical Chemistry, Karlsruhe Institute of Technology, Germany

<sup>d</sup> Institute of Biological Interfaces (IBG-2), Karlsruhe Institute of Technology, Germany

\* Corresponding author email: [zaumseil@uni-heidelberg.de](mailto:zaumseil@uni-heidelberg.de)

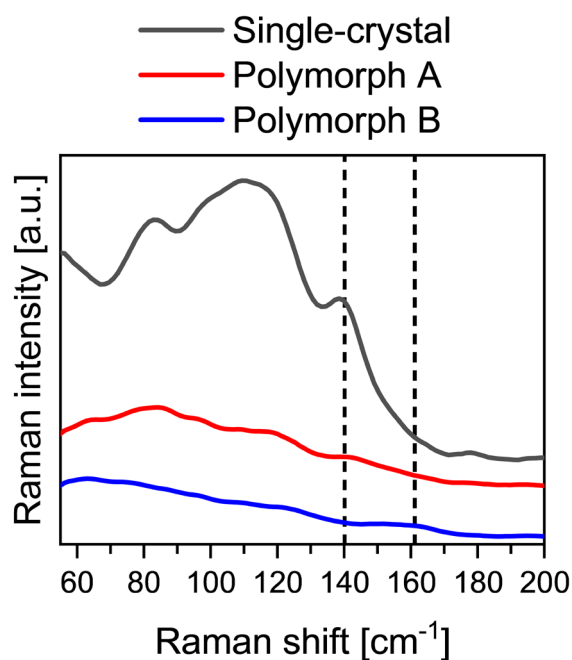

**Figure S1.** Stacked Raman spectra without baseline correction as collected from PDIF-CN<sub>2</sub> single crystal and thin films of PDIF-CN<sub>2</sub> (polymorphs A and B). Vertical lines highlight the two Raman modes that are markedly different for the two polymorphs.

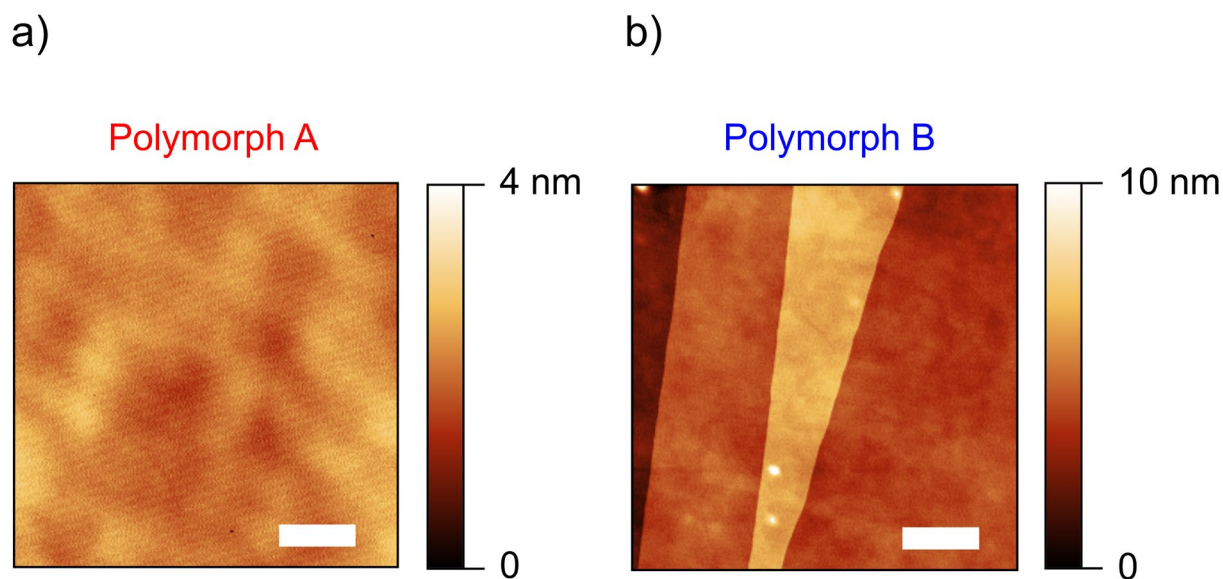

**Figure S2.** Atomic force microscopy images (ScanAsyst<sup>TM</sup> mode) of zone-cast PDIF-CN<sub>2</sub> films of (a) polymorph A (rms 0.29 nm) and (b) polymorph B (rms 0.34 nm, step-height:  $2 \pm 0.2$  nm). Images are  $5 \times 5 \mu\text{m}^2$ , scale bar  $1 \mu\text{m}$ .

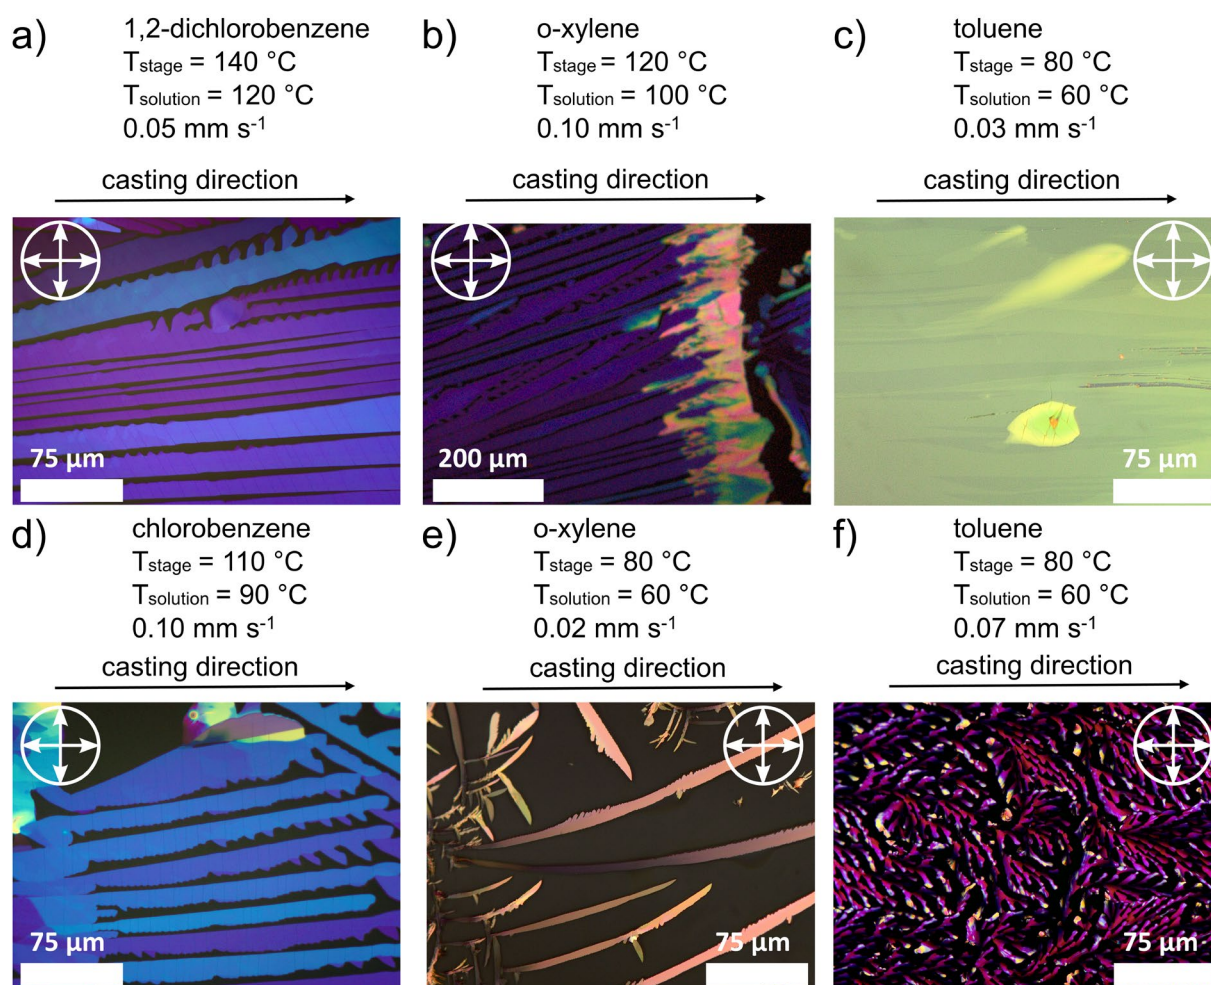

**Figure S3.** Cross-polarized optical microscope images of PDIF-CN<sub>2</sub> films that were zone-cast from different solvents under different conditions. Note, PDIF-CN<sub>2</sub> films a), b), d), f) were zone-cast on Si/SiO<sub>2</sub>/BCB substrates.

## Polymorph A

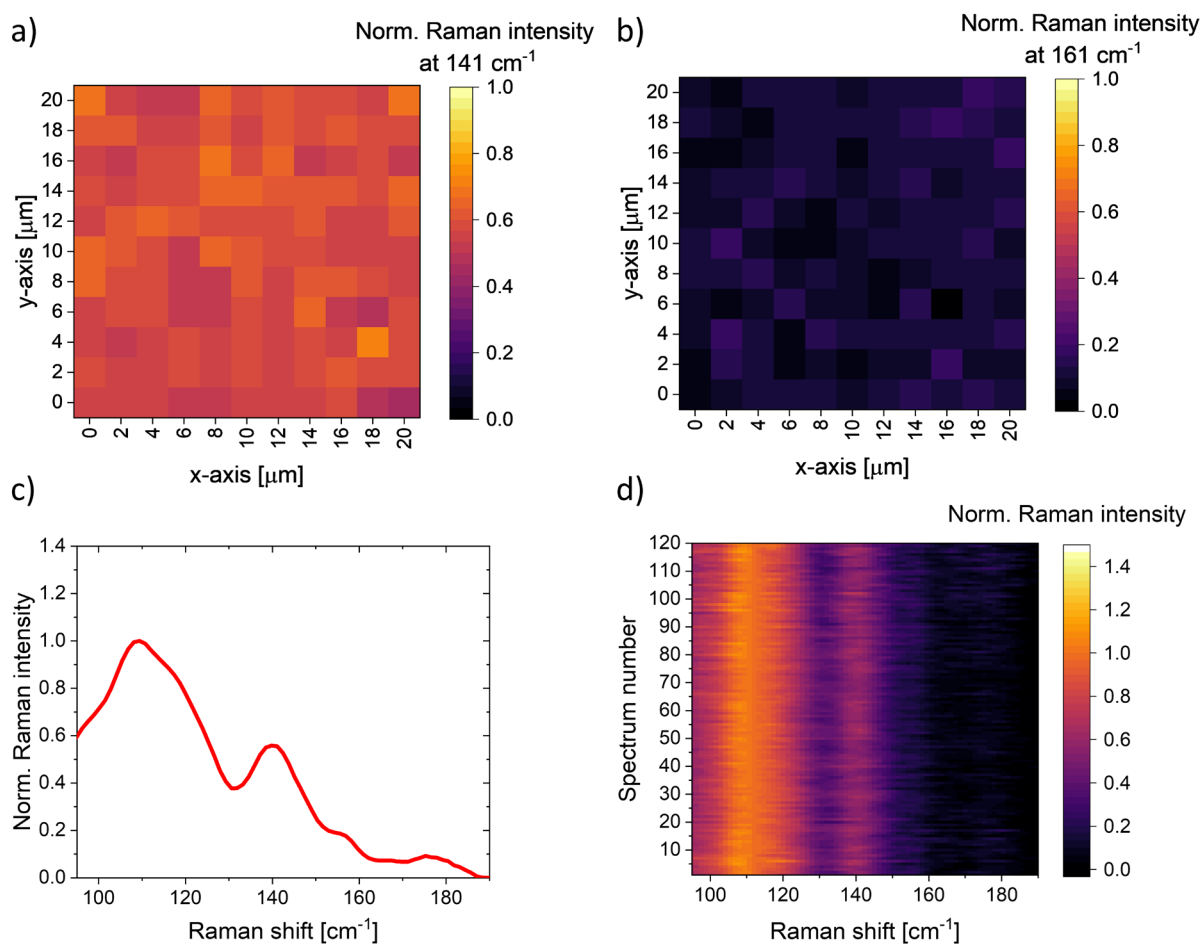

**Figure S4.** Thin film of PDIF-CN<sub>2</sub> zone-cast from o-xylene (polymorph A): Raman intensity maps over an area of  $20 \times 20\ \mu\text{m}^2$  at (a)  $141\text{ cm}^{-1}$  and (b)  $161\text{ cm}^{-1}$  normalized to the Raman signal at  $114\text{ cm}^{-1}$ . Averaged and normalized Raman spectrum (c) and hyperspectral map (d) of the Raman data in (a) and (b), indicating a large and homogeneous area of only polymorph A.

## Polymorph B

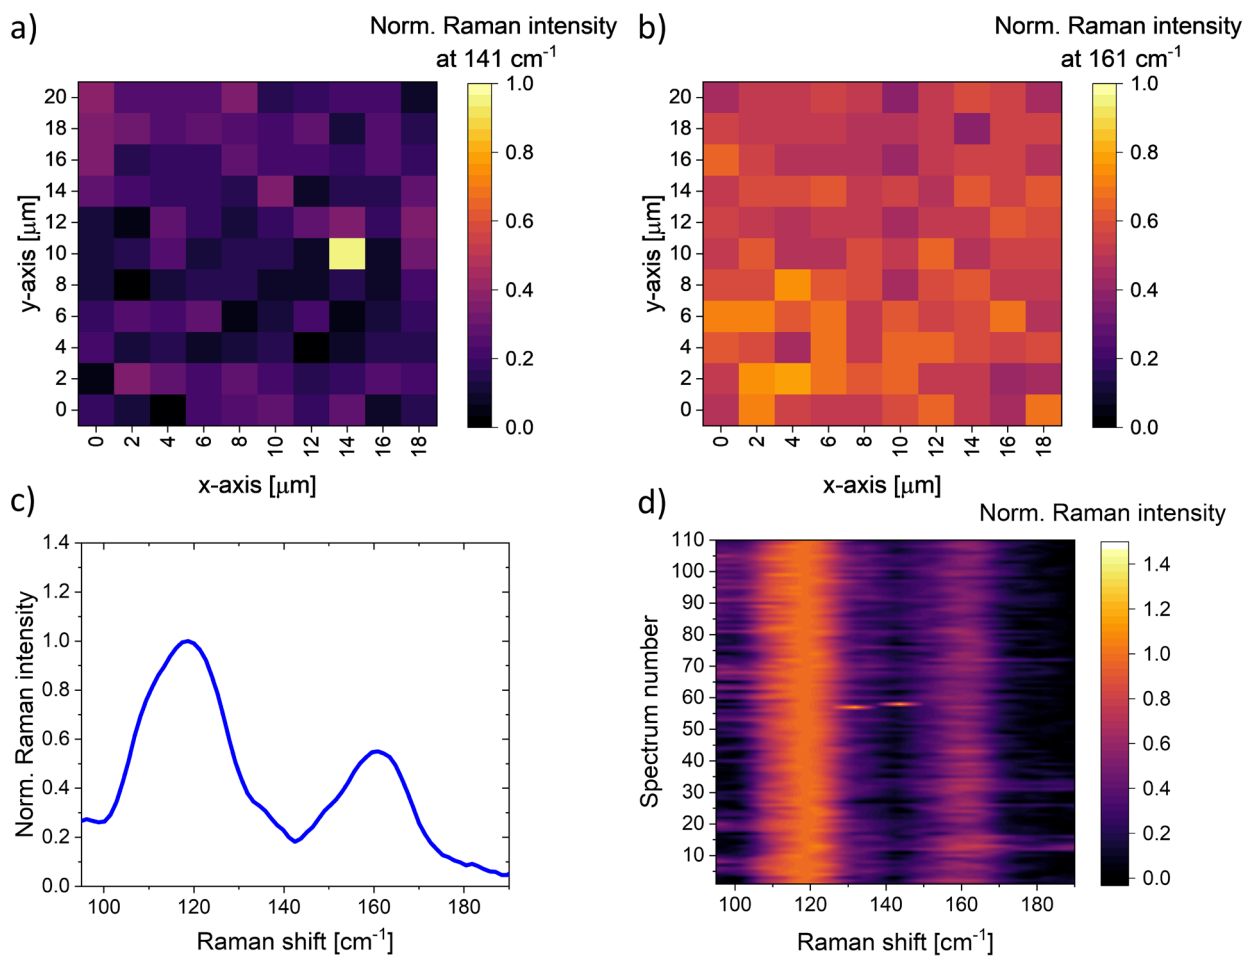

**Figure S5.** Thin film of PDIF-CN<sub>2</sub> zone-cast from toluene (polymorph B): Raman intensity maps over an area of 20 x 20 μm<sup>2</sup> at (a) 141 cm<sup>-1</sup> and (b) 161 cm<sup>-1</sup> normalized to the Raman signal at 119 cm<sup>-1</sup>. Averaged and normalized Raman spectrum (c) and hyperspectral map (d) of the Raman data in (a) and (b), indicating a large and homogeneous area of only polymorph B.

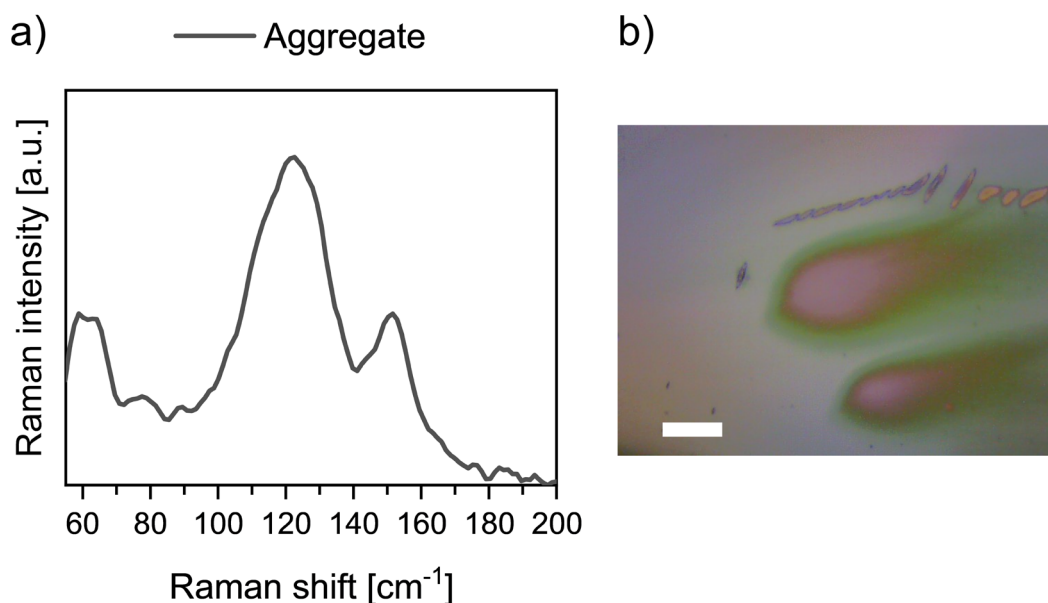

**Figure S6.** (a) Baseline corrected normalized Raman spectra of a teardrop-shaped aggregate in a thin-film zone-cast from toluene. (b) Microscope images of a teardrop-shaped aggregate, scale bar 20  $\mu\text{m}$ .

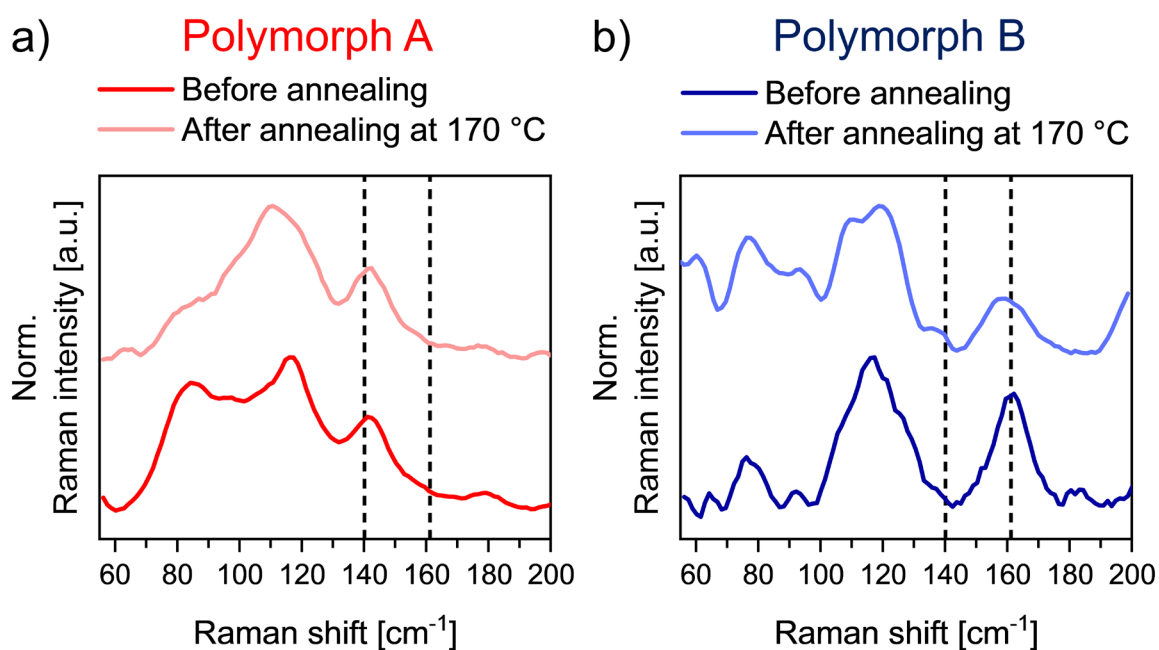

**Figure S7.** (a) Stacked, baseline corrected and normalized Raman spectra of thin-films of (a) polymorph A and (b) polymorph B before and after thermal annealing at 170  $^{\circ}\text{C}$  for 1 hour. Vertical lines highlight the two Raman modes that are markedly different for the two polymorphs.

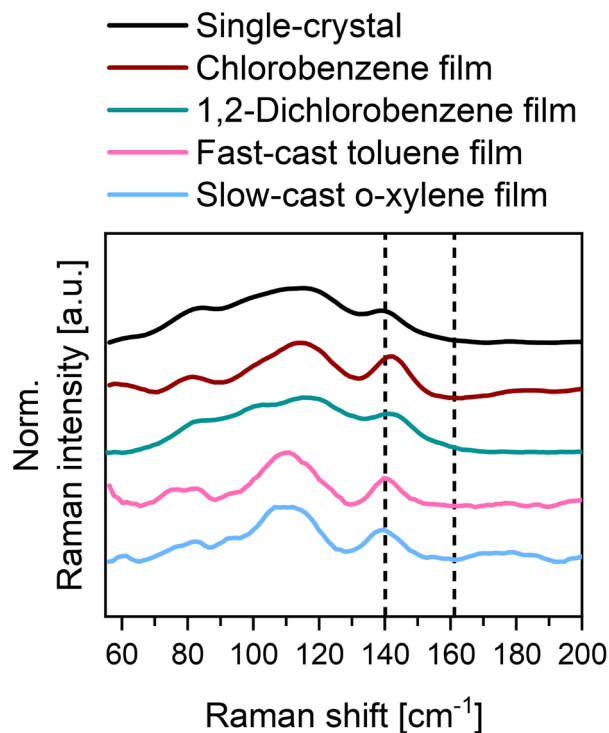

**Figure S8.** Stacked baseline corrected normalized Raman spectra collected from PDIF-CN<sub>2</sub> single-crystal and PDIF-CN<sub>2</sub> thin films deposited from chlorobenzene and 1,2-dichlorobenzene under the optimized casting conditions as shown in **Figure S3d** and **S3a** and from toluene and o-xylene under non-optimal conditions as shown in **Figure S3f** and **S3e**, respectively. Vertical lines highlight the two Raman modes that are markedly different for polymorph A and B.

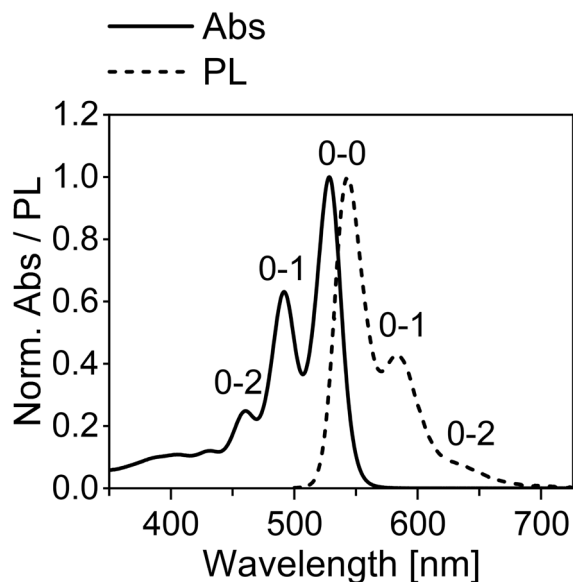

**Figure S9.** Normalized absorption (Abs) and photoluminescence (PL) spectrum of a dilute PDIF-CN<sub>2</sub> in toluene solution.

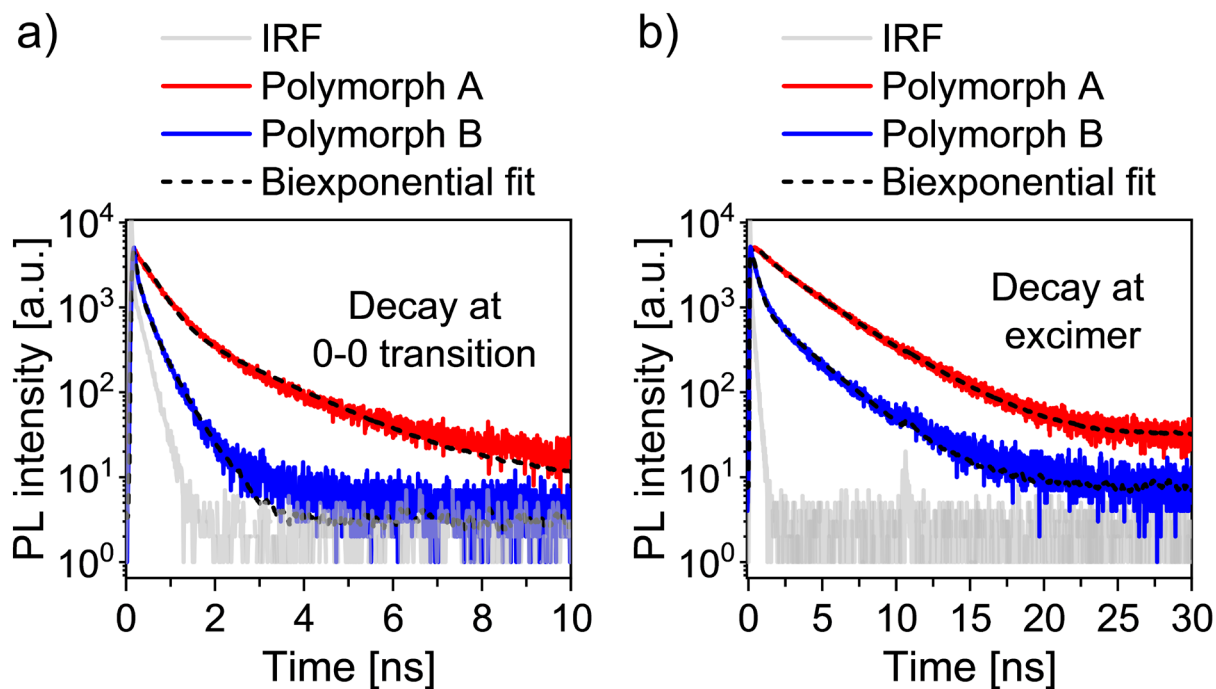

**Figure S10.** (a) TCSPC histograms of the photoluminescence decay of the 0-0 transition of polymorph A (red, emission at 615 nm) and polymorph B (blue, emission at 580 nm); (b) TCSPC histograms of the photoluminescence decay of the excimer emission of polymorph A (red, emission from 700 nm to 950 nm) and polymorph B (blue, emission from 700 nm to 950 nm). In all cases the time traces were fitted as a biexponential decay (black) with a re-convolution method including the instrument response function (IRF, gray).

**Table S1.** Extracted short and long lifetime components ( $\tau_{\text{short}}$ ,  $\tau_{\text{long}}$ ) and corresponding normalized amplitudes ( $A_{\text{short}}$ ,  $A_{\text{long}}$ ) for the PL emission of the 0-0 transition (polymorph A: 615 nm; polymorph B, 580 nm) and of the excimer (700 nm to 950 nm).

|             | Decay at 0-0-transition   |                               |                          |                              | Decay at excimer          |                               |                          |                              |
|-------------|---------------------------|-------------------------------|--------------------------|------------------------------|---------------------------|-------------------------------|--------------------------|------------------------------|
|             | $A_{\text{short}}$<br>[%] | $\tau_{\text{short}}$<br>[ps] | $A_{\text{long}}$<br>[%] | $\tau_{\text{long}}$<br>[ns] | $A_{\text{short}}$<br>[%] | $\tau_{\text{short}}$<br>[ps] | $A_{\text{long}}$<br>[%] | $\tau_{\text{long}}$<br>[ns] |
| Polymorph A | 88                        | 310                           | 12                       | 1.7                          | 30                        | 870                           | 70                       | 3.7                          |
| Polymorph B | 93                        | 72                            | 7                        | 0.49                         | 84                        | 300                           | 16                       | 2.9                          |



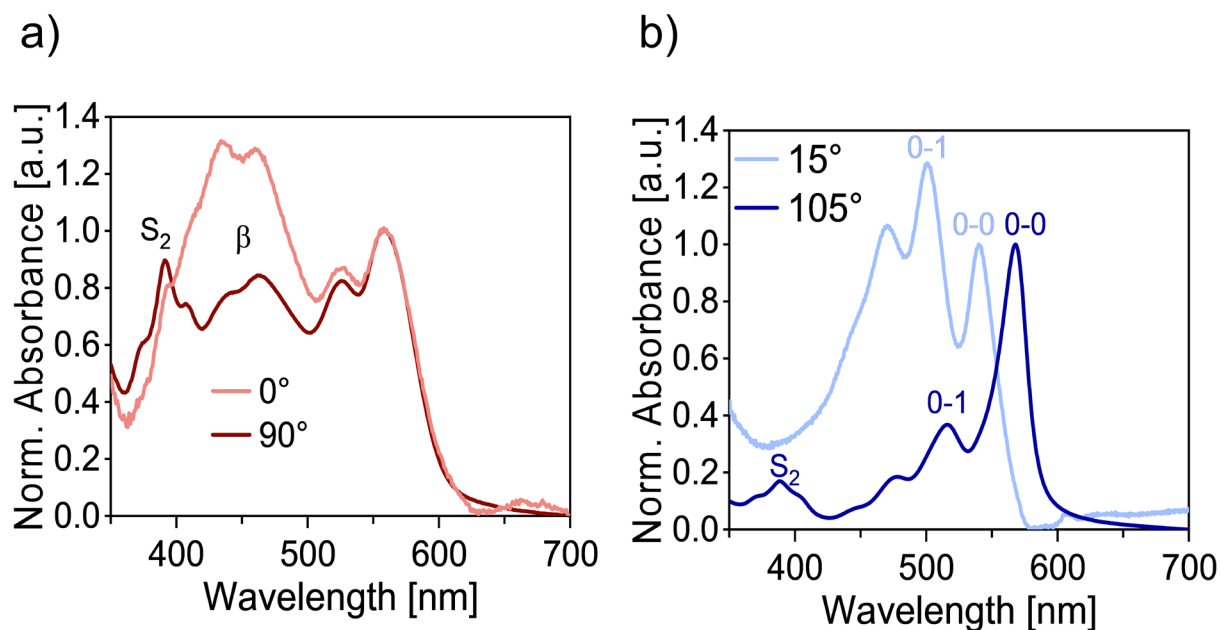

**Figure S11.** Normalized polarized UV-Vis absorption spectra of (a) polymorph A (PDIF-CN<sub>2</sub> zone-cast from o-xylene) and (b) polymorph B (PDIF-CN<sub>2</sub> zone-cast from toluene) with indicated angle of polarization versus casting direction.

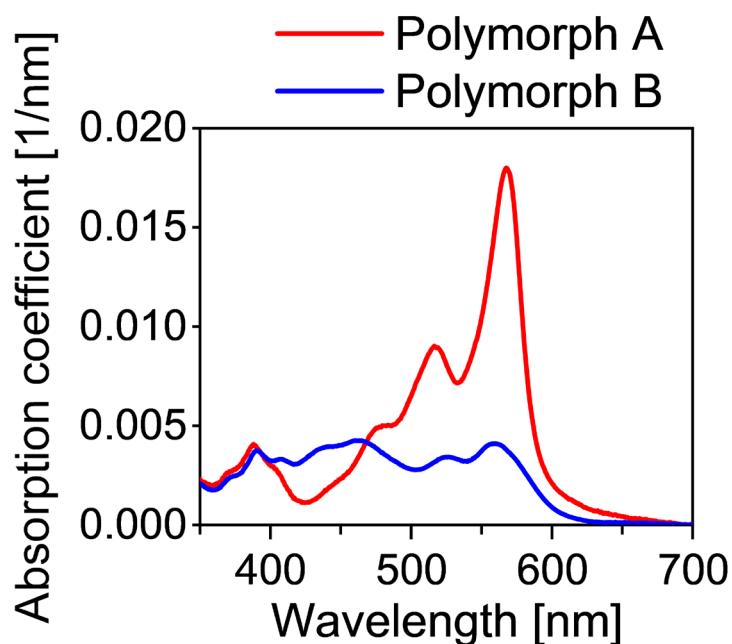

**Figure S12.** Absorption coefficients of thin films of polymorph A and B.

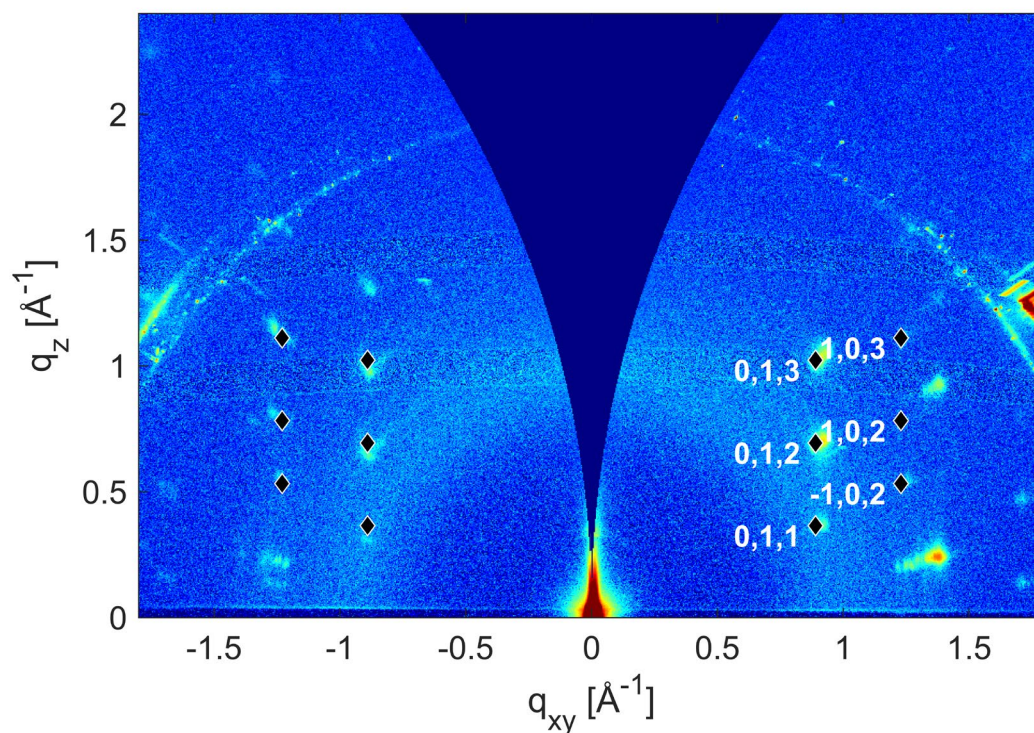

**Figure S13.** GIWAXS data of PDIF-CN<sub>2</sub> film zone-cast from o-xylene collected over an angular range of 180° around an axis vertically perpendicular to the beam. Diffraction peak positions were calculated for unit cell parameters of polymorph A (◆) as shown in Table 1 (main manuscript). The associated crystal planes are labelled by their Miller indices.

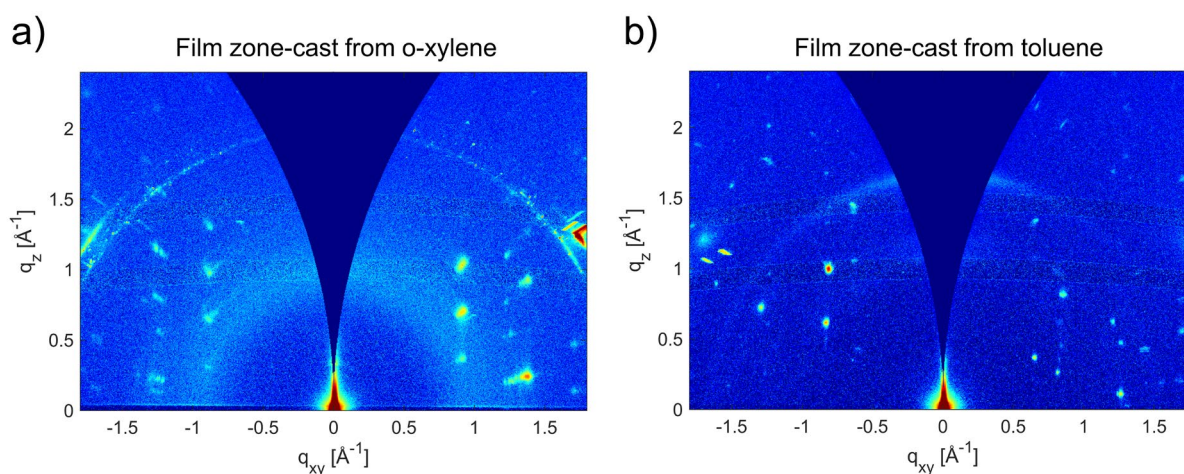

**Figure S14.** GIWAXS data of PDIF-CN<sub>2</sub> films zone-cast from (a) o-xylene and (b) toluene collected over an angular range of 180° around an axis vertically perpendicular to the beam.

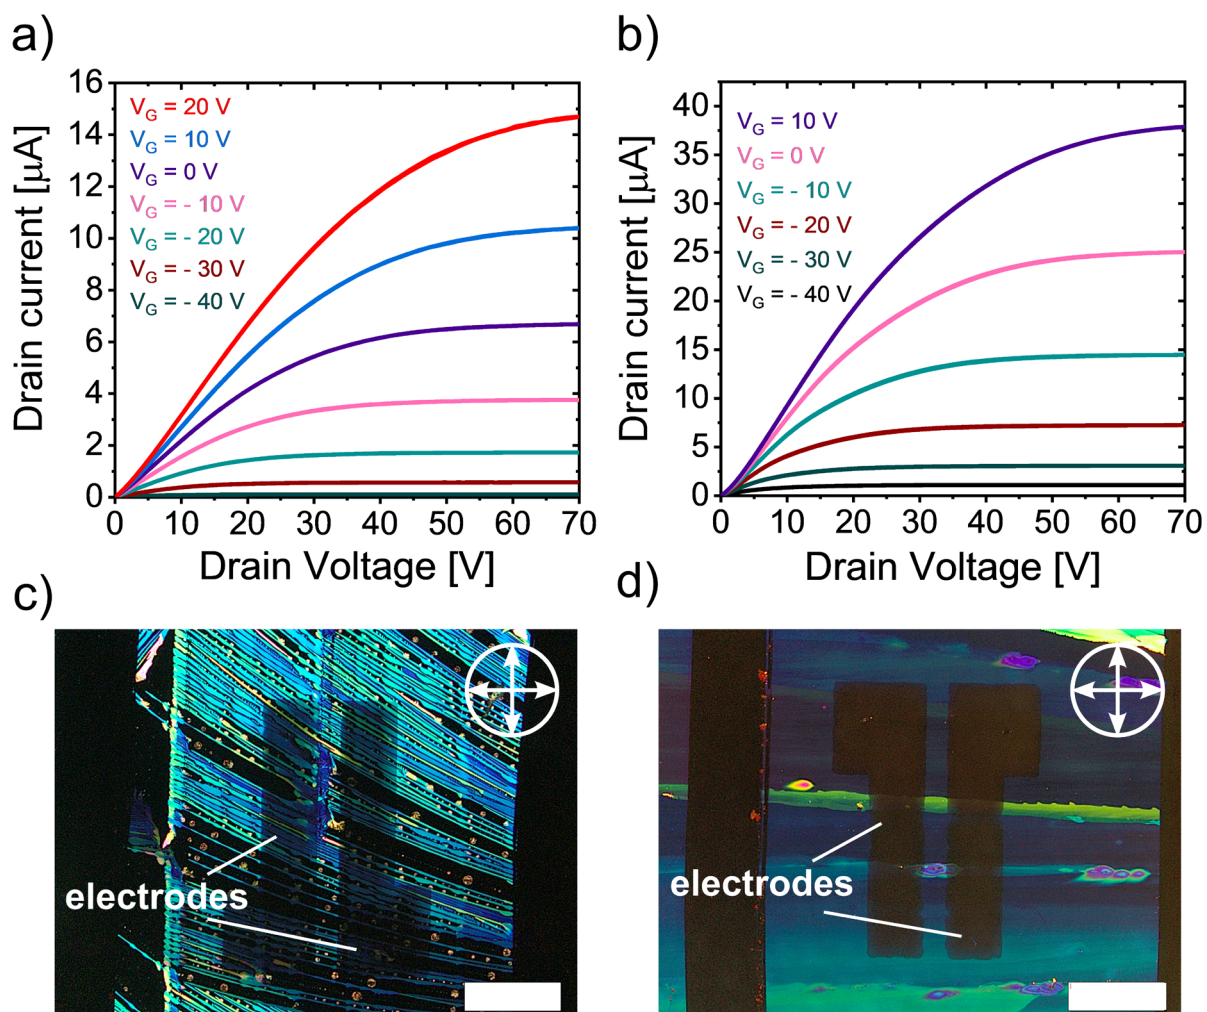

**Figure S15.** Representative output curves of bottom-gate, top-contact transistors of (a) polymorph A and (b) polymorph B and cross-polarized microscope images of the corresponding transistors (c) and (d), scale bar 500  $\mu\text{m}$ .
